# Supplementary material for: Defining Peri-Operative Myocardial Injury during Cardiac Surgery Using High-Sensitivity Troponin T
Source: J Clin Med. 2023 Jun 26;12(13):4291. doi: 10.3390/jcm12134291 (PMC10342425; doi:10.3390/jcm12134291)
Supplement: Supplementary file 1 [file jcm-12-04291-s001.zip › jcm-2413790-supplementary.pdf]

## **Online Supplemental Appendix**

**Supplementary Table S1.** Performance of hs-TnT elevation at 6, 12, 24, 48 and 72 hours after CABG in predicting 1-year all-cause mortality among patients with EF >50% (N=795)

| <b>Time point</b> | <b>X URL</b> | <b>Sensitivity</b> | <b>Specificity</b> | <b>Adjusted AUC (95% CI)*</b> | <b>Adjusted HR (95% CI)*</b> |
|-------------------|--------------|--------------------|--------------------|-------------------------------|------------------------------|
| 6h                | 50           | 71%                | 48%                | 0.701 (0.632-0.770)           | 1.25 (0.74-2.14)             |
|                   | 70           | 51%                | 66%                | 0.700 (0.629-0.771)           | 1.31 (0.77-2.25)             |
|                   | 100          | 46%                | 82%                | 0.713 (0.642-0.785)           | 2.30 (1.30-4.08)             |
| 12h               | 35           | 85%                | 33%                | 0.703 (0.634-0.772)           | 1.32 (0.70-2.49)             |
|                   | 50           | 72%                | 53%                | 0.713 (0.646-0.779)           | 1.77 (1.04-3.01)             |
|                   | 70           | 49%                | 72%                | 0.718 (0.653-0.784)           | 2.02 (1.20-3.39)             |
| 24h               | 35           | 75%                | 51%                | 0.704 (0.635-0.772)           | 1.41 (0.81-2.46)             |
|                   | 50           | 62%                | 69%                | 0.715 (0.647-0.782)           | 1.87 (1.08-3.23)             |
|                   | 70           | 46%                | 82%                | 0.714 (0.645-0.783)           | 1.86 (1.04-3.33)             |
| 48h               | 35           | 69%                | 65%                | 0.730 (0.667-0.793)           | 2.38 (1.34-4.22)             |
|                   | 50           | 52%                | 79%                | 0.721 (0.655-0.786)           | 2.01 (1.13-3.56)             |
|                   | 70           | 39%                | 88%                | 0.734 (0.666-0.801)           | 2.75 (1.50-5.03)             |
| 72h               | 30           | 65%                | 64%                | 0.719 (0.654-0.784)           | 1.95 (1.09-3.50)             |
|                   | 35           | 58%                | 69%                | 0.716 (0.651-0.781)           | 1.84 (1.05-3.20)             |
|                   | 50           | 44%                | 81%                | 0.713 (0.644-0.781)           | 1.85 (1.00-3.41)             |

\*Adjusted for baseline hs-TnT and EuroSCORE

URL: upper reference limit; N: total number of patients; HR: hazard ratio; 95% CI: 95% confidence interval; AUC; area under the Receiver Operator Characteristic curve

**Supplementary Table S2.** Performance of hs-TnT elevation at 6, 12, 24, 48 and 72 hours after CABG in predicting 1-year all-cause mortality among patients with EF 30-50% (N=239)

| Time point | X URL | Sensitivity | Specificity | Adjusted AUC (95% CI)* | Adjusted HR (95% CI)* |
|------------|-------|-------------|-------------|------------------------|-----------------------|
| 6h         | 50    | 68%         | 51%         | 0.615 (0.465-0.764)    | 1.72 (0.62-4.76)      |
|            | 70    | 54%         | 68%         | 0.597 (0.449-0.745)    | 1.72 (0.64-4.67)      |
|            | 100   | 40%         | 85%         | 0.635 (0.484-0.786)    | 2.91 (0.99-8.47)      |
| 12h        | 35    | 74%         | 40%         | 0.594 (0.451-0.736)    | 1.21 (0.41-3.59)      |
|            | 50    | 69%         | 58%         | 0.637 (0.490-0.783)    | 2.08 (0.74-5.81)      |
|            | 70    | 55%         | 74%         | 0.631 (0.480-0.782)    | 2.26 (0.81-6.30)      |
| 24h        | 35    | 66%         | 55%         | 0.613 (0.464-0.762)    | 1.72 (0.61-4.84)      |
|            | 50    | 58%         | 73%         | 0.626 (0.474-0.778)    | 2.24 (0.76-6.56)      |
|            | 70    | 53%         | 89%         | 0.679 (0.525-0.834)    | 4.39 (1.53-12.59)     |
| 48h        | 35    | 61%         | 64%         | 0.615 (0.459-0.771)    | 1.89 (0.66-5.42)      |
|            | 50    | 55%         | 80%         | 0.653 (0.497-0.808)    | 3.11 (1.02-9.53)      |
|            | 70    | 48%         | 88%         | 0.692 (0.538-0.847)    | 5.28 (1.69-16.45)     |
| 72h        | 30    | 67%         | 63%         | 0.626 (0.465-0.787)    | 2.15 (0.77-6.01)      |
|            | 35    | 65%         | 69%         | 0.652 (0.491-0.812)    | 2.99 (1.02-8.74)      |
|            | 50    | 51%         | 83%         | 0.669 (0.516-0.822)    | 3.81 (1.24-11.66)     |

\*Adjusted for baseline hs-TnT and EuroSCORE

URL: upper reference limit; N: total number of patients; HR: hazard ratio; 95% CI: 95% confidence interval; AUC; area under the Receiver Operator Characteristic curve

**Supplementary Table S3.** Performance of hs-TnT elevation at 6, 12, 24, 48 and 72 hours after CABG in predicting 1-year all-cause mortality among patients with EF <30% (N=123)

| Time point | X URL | Sensitivity | Specificity | Adjusted AUC (95% CI)* | Adjusted HR (95% CI)* |
|------------|-------|-------------|-------------|------------------------|-----------------------|
| 6h         | 50    | 63%         | 62%         | 0.731 (0.573-0.889)    | 1.40 (0.43-4.54)      |
|            | 70    | 56%         | 77%         | 0.717 (0.557-0.876)    | 0.96 (0.27-3.44)      |
|            | 100   | 29%         | 92%         | 0.744 (0.580-0.908)    | 4.11 (1.08-15.59)     |
| 12h        | 35    | 89%         | 51%         | 0.739 (0.578-0.900)    | 1.54 (0.46-5.15)      |
|            | 50    | 58%         | 71%         | 0.726 (0.562-0.889)    | 1.32 (0.41-4.27)      |
|            | 70    | 54%         | 83%         | 0.725 (0.567-0.882)    | 1.18 (0.33-4.21)      |
| 24h        | 35    | 67%         | 62%         | 0.720 (0.558-0.881)    | 1.15 (0.35-3.74)      |
|            | 50    | 57%         | 80%         | 0.729 (0.567-0.890)    | 1.44 (0.42-4.91)      |
|            | 70    | 48%         | 88%         | 0.716 (0.556-0.876)    | 0.84 (0.20-3.47)      |
| 48h        | 35    | 67%         | 75%         | 0.752 (0.583-0.920)    | 2.71 (0.79-9.29)      |
|            | 50    | 56%         | 88%         | 0.760 (0.598-0.922)    | 2.85 (0.80-10.10)     |
|            | 70    | 41%         | 93%         | 0.743 (0.576-0.910)    | 3.95 (1.12-13.92)     |
| 72h        | 30    | 83%         | 73%         | 0.804 (0.653-0.954)    | 5.01 (1.31-19.11)     |
|            | 35    | 76%         | 78%         | 0.772 (0.604-0.941)    | 3.54 (1.11-11.25)     |
|            | 50    | 50%         | 90%         | 0.752 (0.583-0.921)    | 4.65 (1.45-14.91)     |

\*Adjusted for baseline hs-TnT and EuroSCORE

URL: upper reference limit; N: total number of patients; HR: hazard ratio; 95% CI: 95% confidence interval; AUC; area under the Receiver Operator Characteristic curve

**Supplementary Figure S1.** Unadjusted area under the curve (AUC) for each hs-TnT elevation at 6, 12, 24, 48 and 72 hours after CABG

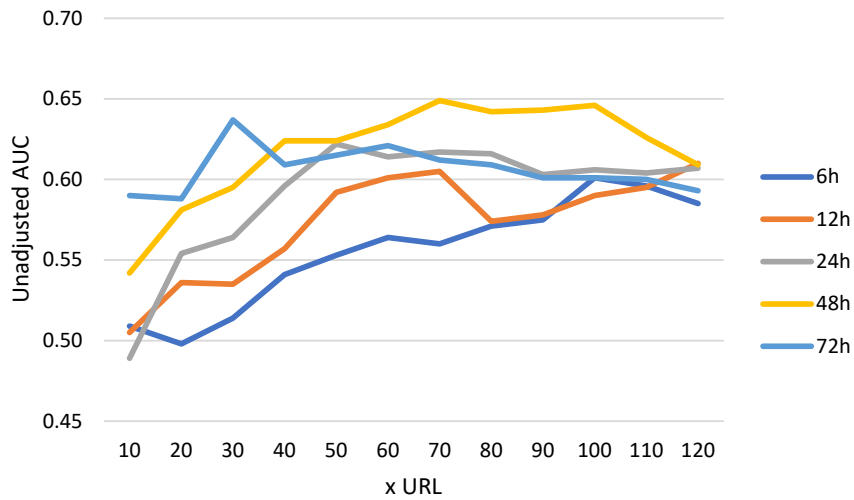

The first peak of the AUC occurred at 100xURL at 6 hours, 70xURL at 12 hours, 50xURL at 24 hours, 70xURL at 48 hours, and 30xURL at 72 hours. Hence, we selected these thresholds. Thresholds <50xURL at 6 hours,  $\geq 100$ xURL at 12 hours, 24 hours and 48 hours, and  $\geq 70$ xURL at 72 hours were not shown in the main tables as there were very few outcomes at these thresholds. In addition, we looked at threshold  $\geq 35$ xURL as the Society for Cardiovascular Angiography and Interventions defined clinically relevant PMI as  $\geq 35$ xURL elevation in troponin in the presence of additional evidence of coronary ischemia or  $\geq 70$ xURL elevation by itself.
